1  
2  
3  
4  
5  
6  
7  
8  
9  
10  
11  
12  
13  
14  
15  
16  
17  
18  
19  
20  
21  
22  
23  
24  
25  
26  
27  
28  
29  
30

## Disentangling the causes for faster-X evolution in aphids

Jaquiéry J<sup>1\*</sup>, Peccoud J<sup>2</sup>, Ouisse T<sup>1</sup>, Legeai F<sup>3,4</sup>, Prunier-Leterme N<sup>3</sup>, Gouin A<sup>3,4</sup>, Nouhaud P<sup>3,5</sup>, Brisson JA<sup>6</sup>, Bickel R<sup>6</sup>, Purandare S<sup>7</sup>, Poulain J<sup>8</sup>, Battail C<sup>9</sup>, Lemaitre C<sup>4</sup>, Mieuze L<sup>3</sup>, Le Trionnaire G<sup>3</sup>, Simon JC<sup>3§</sup>, Rispe C<sup>10§</sup>

<sup>1</sup> Université de Rennes 1, CNRS UMR 6553 ECOBIO, Avenue du Général Leclerc, Campus de Beaulieu, 35042 Rennes Cedex, France

<sup>2</sup> Université de Poitiers, UMR CNRS 7267 Ecologie et Biologie des Interactions, Equipe Ecologie Evolution Symbiose, TSA 51106, 86073 Poitiers Cedex 9, France

<sup>3</sup> IGEPP, INRA, Domaine de la Motte, F-35653 Le Rheu cedex, France.

<sup>4</sup> INRIA Centre Rennes - Bretagne Atlantique, GenOuest, Campus de Beaulieu, 35042 Rennes, France.

<sup>5</sup> Institute of Population Genetics, Vetmeduni Vienna, Vienna, Austria

<sup>6</sup> University of Rochester, Department of Biology, Rochester, NY 14627 USA

<sup>7</sup> Department of Entomology, Ohio Agricultural Research and Development Center, Ohio State University, Wooster, OH 44691

<sup>8</sup> Commissariat à l'Energie Atomique (CEA), Institut de Génomique (IG), Genoscope, 2, rue Gaston-Crémieux, CP 5706, 91057 Evry, France

<sup>9</sup> Commissariat à l'Energie Atomique (CEA), Institut de Génomique (IG), Centre National de Génotypage (CNG), 2, rue Gaston-Crémieux, CP 5706, 91057 Evry, France

<sup>10</sup> BIOEPAR, INRA, ONIRIS, La Chantrerie, F-44307 Nantes, France

§ joint last authors

**\*Author for Correspondence:** Julie Jaquiéry, Université de Rennes 1, CNRS UMR 6553 ECOBIO, Avenue du Général Leclerc, Campus de Beaulieu, 35042 Rennes Cedex, France, tel. ++33 2 23 23 56 92, fax ++33 2 23 23 50 26, [Julie.Jaquiery@univ-rennes1.fr](mailto:Julie.Jaquiery@univ-rennes1.fr)

**Running title:** X chromosome evolution in aphids

## 31 **Abstract**

32 Faster evolution of X chromosomes has been documented in several species and results from  
33 the increased efficiency of selection on recessive alleles in hemizygous males and/or from  
34 increased drift due to the smaller effective population size of X chromosomes. Aphids are  
35 excellent models for evaluating the importance of selection in faster-X evolution, because  
36 their peculiar life-cycle and unusual inheritance of sex-chromosomes lead to equal effective  
37 population sizes for X and autosomes. Because we lack a high-density genetic map for the pea  
38 aphid whose complete genome has been sequenced, we assigned its entire genome to the X  
39 and autosomes based on ratios of sequencing depth in males and females. Unexpectedly, we  
40 found frequent scaffold misassembly, but we could unambiguously locate 13,726 genes on the  
41 X and 19,263 on autosomes. We found higher non-synonymous to synonymous substitutions  
42 ratios ( $dN/dS$ ) for X-linked than for autosomal genes. Our analyses of substitution rates  
43 together with polymorphism and expression data showed that relaxed selection is likely to  
44 contribute predominantly to faster-X as a large fraction of X-linked genes are expressed at  
45 low rates and thus escape selection. Yet, a minor role for positive selection is also suggested  
46 by the difference between substitution rates for X and autosomes for male-biased genes (but  
47 not for asexual female-biased genes) and by lower Tajima's D for X-linked than for  
48 autosomal genes with highly male-biased expression patterns. This study highlights the  
49 relevance of organisms displaying alternative inheritance of chromosomes to the  
50 understanding of forces shaping genome evolution.

51

52

53 **Keywords:** Sex chromosome, sex-biased expression, evolutionary rates, hemizyosity,  
54 selection, drift.

2

## 55 **Introduction**

56 Sex chromosomes are major players in evolution. Besides their role in sex determination, sex  
57 chromosomes contribute to genomic conflicts (Rice 1984; Meiklejohn and Tao 2010; Soh et  
58 al. 2014), genetic incompatibilities and reproductive isolation (Coyne and Orr 2004; Saether  
59 et al. 2007; Kitano et al. 2009; Johnson and Lachance 2012). A pair of sex-determining  
60 chromosomes typically evolves toward reduced recombination rates (crossing overs), which  
61 eventually causes one of the sex chromosomes to gradually lose most of the chromosomal  
62 regions (loci) present in the alternate one (Charlesworth et al. 2005). These loci will thus be  
63 found in single copy in the sex that carries the degenerate, smaller sex chromosome. When  
64 the heterogametic sex is the male, sex chromosomes are denoted X and Y (e.g., in mammals),  
65 whereas when it is the female, sex chromosomes are noted W and Z (e.g., in birds). Alleles of  
66 loci present only on the X (W) are more exposed to selection in individuals of the  
67 heterogametic sex, facilitating the fixation of beneficial mutations and the purging of  
68 deleterious ones (Charlesworth et al. 1987). On the other hand, because males (XY) bear and  
69 transmit a single X chromosome, effective population size is smaller for the X compared to  
70 autosomes (Wright 1931; Caballero 1994; Caballero 1995). This increases the rate of fixation  
71 of slightly deleterious mutations on the X by genetic drift (Kimura 1983) (the same principles  
72 apply to ZW systems, so we ignore these in the following). Consequently, X-linked genes  
73 may evolve faster than autosomes (“faster-X” evolution) due to higher positive selection (rate  
74 of fixation of beneficial mutations) and/or higher genetic drift (rate of fixation of slightly  
75 deleterious mutations) (Vicoso et al. 2009, Mank et al. 2010). Faster evolution of X-linked  
76 proteins is supported by observations in a large panel of species (e.g., *Drosophila*, nematodes,  
77 mammals, birds, see Meisel and Connallon 2013 for a review). In some, a preponderant effect

78 of drift was demonstrated (Mank et al. 2010; Avila et al. 2014), while positive selection  
79 would play a predominant role in other species (Baines et al. 2008; Hvilsom et al. 2012;  
80 Langley et al. 2012; Mackay et al. 2012; Kousathanas et al. 2014; Sackton et al. 2014; Avila  
81 et al. 2015).

82 In this context, organisms with atypical inheritance of sex chromosome can greatly  
83 facilitate inferences about the processes contributing to the evolution of sex chromosomes  
84 (Bachtrog et al. 2011). Among those, aphids, which present X0 males and XX females, have  
85 equal effective population sizes for X chromosomes and autosomes (Jaquiéry et al. 2012a).  
86 This eliminates one possible confounding factor of faster-X evolution, the smaller effective  
87 population size of the X, helping to properly test its causes. Aphids reproduce by cyclical  
88 parthenogenesis, such that males and sexual females constitute only a short part of their life-  
89 cycle, which is dominated by apomictic parthenogenetic (clonal) XX females (figure 1).  
90 Males are produced asexually via the elimination of one X from the germ line (Wilson et al.  
91 1997; Caillaud et al. 2002). As a result, X-linked recessive alleles are exposed to selection in  
92 male aphids, just like in other X0 or XY males. However, because all sexually-produced  
93 aphid eggs are XX females, all the progeny inherit their X from males and sexual females in  
94 equal proportions. This difference from other heterogametic systems, where progeny present  
95 even sex ratios, has deep consequences for the evolutionary trajectory of the aphid X  
96 chromosome (Jaquiéry et al. 2012a). Furthermore, in contrast to standard systems, variance in  
97 reproductive success between sexes, population expansion, bottlenecks and sex-biased  
98 dispersal should not differentially affect sex chromosomes and autosomes in aphids (Jaquiéry  
99 et al. 2012a). Mutation and recombination rates are also expected to be equal across  
100 chromosomes because of their similar mode of inheritance and the complete absence of  
101 crossing overs in males (Jaquiéry et al. 2012a). These similarities between X chromosomes

102 and autosomes make aphids exceptionally useful to pinpoint the causes of faster-X evolution,  
103 since the factors mentioned above need not be accounted for. Still, a notable difference  
104 between X and autosome in aphids is the theoretical propensity of the X to accumulate  
105 sexually antagonistic mutations beneficial for males and detrimental to asexual females,  
106 which also is the consequence of cyclical parthenogenesis combined with the inheritance of  
107 the X (Jaquiéry et al. 2013).

108         Empirical analyses on a small subset of genes of the pea aphid (*Acyrtophon pisum*)  
109 showed that X-linked genes evolve faster than autosomal genes (Jaquiéry et al. 2012a) and  
110 that genes expressed predominantly in males (hereafter “male-biased” genes) predominantly  
111 locate on the X (Jaquiéry et al. 2013). Subsequent genome-wide analyses did not however  
112 support faster-X evolution (Purandare et al. 2014), and mitigated the degree of enrichment of  
113 male-biased genes on the X (Purandare et al. 2014; Pal and Vicoso 2015). These  
114 discrepancies however likely stem from the fact that these two studies did not assign  
115 individual genes to chromosome types, but entire scaffolds, which present assembly errors (as  
116 shown by Bickel et al. 2013 and suggested by Jaquiéry et al. 2013). Misassignment of genes  
117 to chromosomes would indeed artificially decrease the contrast between X-linked and  
118 autosomal genes.

119         Here, we aimed to go past these shortcomings in order to fully disentangle the causes  
120 for faster-X evolution in aphids. For this, we first attributed genes to the X or to autosomes at  
121 the scale of the entire genome in the pea aphid. On a large set of genes, we combined  
122 estimates of substitution rates at the interspecific level with polymorphism data in pea aphid  
123 populations and gene expression levels in the various genders and morphs. This allowed  
124 assessing how relaxed selection (genetic drift) and adaptation contribute to the faster  
125 evolution of the X chromosome in this system.

## 126 **Material and Methods**

### 127 **Assignment of scaffold regions to the X and autosomes**

#### 128 *Full-genome sequencing of females and males*

129 An asexual aphid mother has the same diploid autosomal genome as her sons, but has two X  
130 chromosomes instead of just one (figure 1). We took advantage of this XX/X0 system to  
131 assign the pea aphid genome sequence (Acyr 2.0, Genbank accession GCA\_000142985.2,  
132 IAGC 2010) to the X or to the autosomes by comparing sequencing depth along assembled  
133 scaffolds between mapped reads from females and from males of the same parthenogenetic  
134 lineage (clone). DNA from five asexual females and five winged and five wingless males of  
135 clone P123 (Simon et al. 2011) was extracted with the Qiagen DNeasy Blood and Tissue kit,  
136 following the manufacturer's protocol. Wing male polymorphism in this clone was used to  
137 determine the X copy that each male carried, based on the knowledge that the locus that  
138 controls this trait is X-linked (Caillaud et al. 2002) and is heterozygous in clone P123 (Frantz  
139 et al. 2010). Each individual was genotyped at seven polymorphic microsatellite markers  
140 (Peccoud et al. 2008) to confirm its identity. One of those markers, which is known to be X-  
141 linked (Caillaud et al. 2002), allowed us to confirm the nature of the X copy inherited by each  
142 male. Three DNA extracts were obtained: one from five females and one per genotype of  
143 males, using five individuals in each. These samples were sequenced on the Illumina HiSeq  
144 2000 platform yielding 100 bp pair-end reads at ~43X coverage for the females sample and 25  
145 to 30X coverage for each male type. Reads from each sample were mapped on scaffolds of  
146 the pea aphid genome assembly (Acyr 2.0) and on genome sequences of the bacterial  
147 symbionts of this pea aphid clone using the method described in Gouin et al. (2015) using  
148 Bowtie 2 (Langmead and Salzberg 2012) with proper insert sizes and parameters set as

149 default. Depth of coverage at each nucleotide position of the reference genome was recorded  
150 and single nucleotide polymorphisms (SNPs) were identified using GATK's Haplotype Caller  
151 (McKenna et al. 2010; DePristo et al. 2011). The raw sequence data has been deposited in the  
152 SRA division of Genbank (project accession: ERP022905 and PRJNA385573).

153

#### 154 *Comparison of sequencing depth between males and females*

155 The following analysis was performed in R (R Development Core Team 2015). We analyzed  
156 genome positions covered by 20 to 70 reads in the asexual female sample, a range chosen to  
157 eliminate regions with low-coverage and regions with suspiciously high coverage (potentially  
158 duplicated or repeat-rich regions). Since overall coverage was slightly higher for one of the  
159 male types (~30X) than for the other (~25X), we normalized the depth of coverage data of the  
160 second male type (multiplying coverage estimates by a 30/25 ratio). We then averaged depth  
161 of coverage at each base position over male types. The ratio of median coverage depth of  
162 males to median coverage depth of the female sample was calculated on 10-kilobases (kb)  
163 scaffold windows sliding by 2-kb steps. A single window was used for scaffolds shorter than  
164 10 kb. We expect the ratio of median coverage depth to be twice larger for autosomal regions  
165 than for the X chromosome. Accordingly, this ratio had a clearly bimodal distribution  
166 (supplementary figure S1), with modes at 0.34 and 0.66. We assigned a 10-kb window to the  
167 X if its ratio ranged between 0.2 and 0.445, to autosomes if it ranged between 0.53 and 1,  
168 whereas the region was tagged as "ambiguous" if it ranged between 0.445 and 0.53. Windows  
169 assigned to the same chromosome type and which were separated by less than four  
170 consecutive "ambiguous" windows were aggregated into a scaffold region we call a "block".  
171 A whole block, including its "ambiguous" windows, was assigned to the corresponding  
172 chromosome type.

173

174 *Comparison of male and female genotypes*

175 Inheritance of single nucleotide polymorphisms (SNPs) also informs on the type of  
176 chromosome carrying a scaffold block. In fact, SNPs that are heterozygous in females but are  
177 also heterozygous in males are necessarily located on autosomes. Conversely, SNPs which are  
178 heterozygous in females but homozygous in males must be on the X. This SNP-based  
179 approach is however expected to be less powerful than the depth of coverage-based method  
180 for genomic regions with low heterozygosity. Thus, we only used SNP data to validate X/A  
181 assignments based on depth of coverage ratio (supplementary figure S2). A position was  
182 determined as heterozygous if the rarest allele was represented in at least 25% of reads,  
183 otherwise it was considered as homozygous. Assignment of SNPs to chromosome types was  
184 performed according to the genotypes of males, as described above. SNPs showing  
185 inconsistent genotypes (e.g., females and males of one type are both heterozygous while  
186 males of the other type are homozygous) were not assigned. SNP-based assignments were  
187 then visually compared to assignments based on depth of coverage (supplementary figure S2).

188

189 **Assignment of predicted genes to the X and autosomes**

190 We used the 36,990 genes that constitute the gene prediction v2.1 for the Acyr 2.0 genome  
191 assembly available at <http://bipaa.genouest.org/is/aphidbase/>. Each of these genes was  
192 determined as X-linked or autosomal if the full length of its coding sequence (CDS) was  
193 comprised in a single scaffold block or was spread over several scaffold blocks assigned to  
194 the same type (either X, or A). Genes that could not be unambiguously assigned (mainly



195 because they located on “ambiguous” blocks) were removed from further analyses. We also  
196 excluded 589 predicted genes that corresponded to rRNA (non-coding DNA).

197

## 198 **Sex-biased gene expression**

199 We used the eight RNAseq libraries from Jaquiéry et al. (2013) to characterize gene  
200 expression patterns between morphs. Briefly, these eight libraries correspond to whole  
201 insects, with three male libraries, three parthenogenetic female libraries and two sexual  
202 female libraries – different libraries in each morph representing biological replicates – using  
203 adults of a single clone of *A. pisum* (clone LSR1). Details regarding aphid rearing, library  
204 preparation and sequencing are provided in Jaquiéry et al. (2013). Libraries were mapped on  
205 Acyr 2.0 as described previously. The number of reads covering each CDS was then counted.  
206 Read counts were normalized with the R package DESeq with default parameters (Anders and  
207 Huber 2010). For each gene, the effect of the morph (a three-level factor comprising male,  
208 sexual female and asexual female) on expression was tested with a GLM (R package MASS,  
209 Venables et al. 2002) with a quasi-poisson distribution of residuals, considering the different  
210 libraries for each morph as replicates. *P*-values were corrected for multiple testing using the  
211 Benjamini-Hochberg method implemented in R. Genes differentially expressed between  
212 morphs ( $p < 0.05$  after adjusting for multiple testing) were then categorized according to their  
213 pattern of expression in the different morphs as described in table 1.

## 214 **Evolutionary rates**

215 To assess substitution rates in X-linked and autosomal genes, sequences from another aphid  
216 species were necessary. *Acyrtosiphon svalbardicum* was chosen, ensuring sufficient genetic  
217 divergence, and reducing the risk of mutational saturation and of chromosomal

218 rearrangements between the two species. Asexual females of *A. svalbardicum* were collected  
219 in Svalbard in 2009, and were then reared in the lab under 10:14 light:dark and 15°C on  
220 *Dryas octopetala*. Ten females were then frozen into liquid nitrogen and kept for subsequent  
221 RNA extraction performed using the RNeasy plant mini kit (Qiagen) according to  
222 manufacturer's instructions. Two separate RNA extractions of 5 adults were performed. RNA  
223 quality was checked on Bioanalyzer (Agilent) and quantified on Nanodrop (Thermo  
224 Scientific). One sample made of a pool of 2 µg of the two independent RNA extractions was  
225 subsequently sent to GATC Company for RNA paired-end sequencing. The raw sequence  
226 data has been deposited in the SRA division of Genbank (project accession: PRJNA385897).

227 *A de novo* transcriptome assembly for *A. svalbardicum* was obtained following the  
228 methods of Risper et al. (2016). Low quality parts of the reads were trimmed from the right  
229 ends with prinseq-lite (<http://prinseq.sourceforge.net/>) when the mean of phred score in a 20-  
230 bp window was below 20. Reads longer than 20 bp after trimming were re-organized by pairs  
231 (orphans were suppressed) and assembled with Trinity (Grabherr et al. 2011) using default  
232 parameters. Coding regions were predicted using FrameDP (Gouzy et al. 2009). Reciprocal  
233 BLASTN (Altschul et al. 1990) searches between CDSs of *A. svalbardicum* and of *A. pisum*  
234 were carried out with an e-value threshold of  $10^{-8}$ . The following steps were performed with  
235 an R script. Reciprocal best hit criterion was used to identify putative orthologous genes  
236 between the two species. These were aligned by the pairWiseAlignment function of the  
237 Biostrings package (Pages et al. 2016). Indels were inspected to flag CDS regions where the  
238 two species did not present the same reading frame. Bases in these regions were replaced with  
239 Ns, and were therefore trimmed by the Gblocks program (Castresana 2000; Talavera and  
240 Castresana 2007), alongside regions of unreliable alignment. We then estimated pairwise  
241 synonymous ( $dS$ ) and nonsynonymous ( $dN$ ) substitution rates for each gene, using the codon-

242 based method of Li (1993), as implemented in the R package seqinR (Charif and Lobry  
243 2007). Only the 9,696 genes (out of 9,924) with an alignment length of >90 nucleotides,  $dN$   
244 <0.3 and  $dS$  <2 were kept. We also truncated  $dN/dS$  ratios to a maximal value of 2.5.

245

## 246 **Estimates of selection intensity based on intraspecific polymorphism**

247 Polymorphism data for *A. pisum* was obtained from 60 genotypes originating from  
248 three *Medicago sativa* fields located in France and Switzerland (Jaquiéry et al. 2012b). These  
249 fields can be considered to harbour a single large population of pea aphids (Jaquiéry et al.  
250 2012b, Peccoud et al. 2009a). DNA was individually extracted from four asexual females of  
251 each clone using the method described above. Because the approach described below does not  
252 require reconstructing allele sequences or individual genotypes, sequencing the pooled  
253 individuals (Gautier et al. 2013) was used to save costs. After RNase treatment on each  
254 sample and DNA dosage with Pherastar, DNA samples were pooled to attain equimolar  
255 proportions. Paired-end libraries were then sequenced on two lanes of Illumina HiSeq 2000  
256 using the Illumina Sequencing Kit v3 (producing 100-bp reads) by Beckman Coulter  
257 Genomics (Danvers MA, USA). This yielded ~85X of sequencing coverage, hence an  
258 expectation of 0.71X per individual chromosome. Reads were mapped on Acyr 2.0 and  
259 symbiont genome sequences as described previously. The two alignment (BAM) files (one  
260 per sequencing lane) were filtered from PCR duplicates using SAMtools rmdup (Li et al.  
261 2009) and reads realigned near indels using the Genome Analysis Toolkit (McKenna et al.  
262 2010). The raw sequence data have been deposited in the SRA division of Genbank (project  
263 accession: PRJNA385905).

264           The two BAM files were merged and converted as pileup format using SAMtools  
265 (options -B -Q 0 -R) (Li et al. 2009). A modified estimator of Tajima's D (Tajima  
266 1989) which takes into account sequencing errors (Achaz 2008) was then calculated from  
267 this mpileup with Popoolation 1.2.2 (Kofler et al. 2011), after subsampling at a uniform  
268 coverage (subsample-pileup.pl, options : --target-coverage 30 --max-coverage 120 --method  
269 withoutreplace). Computations were performed for each gene including introns (Variance-at-  
270 position.pl --pool-size 120). Tajima's D allows evaluating the type of selection at work, since  
271 selective sweeps and/or purifying selection tend to decrease it, and balancing selection tends  
272 to increase it.

273           The McDonald and Kreitman (1991) approach, which compares fixed mutations to  
274 polymorphic mutations in CDS, was adopted to further evaluate selection pressures on these  
275 different categories of genes, using the DoS estimate (Direction of Selection, Stoletzki and  
276 Eyre-Walker 2011). Positive, null and negative values of DoS respectively suggest adaptive  
277 evolution, neutral evolution, and purifying selection. Fixed mutations between species were  
278 counted from alignments we previously generated for *A. svalbardicum* and *A. pisum* CDSs.  
279 We restricted the analysis to regions of reliable alignments, as given by the Gblocks txts  
280 outputs. In these regions, we called SNPs on the BAM files with LoFreq (Wilm et al. 2012),  
281 which offers a good compromise between speed, sensitivity and accuracy in pools of multiple  
282 individuals (Huang et al. 2015). We used SAMtools mpileup (Li et al. 2009) to assess depth  
283 of coverage at all positions in these regions, polymorphic or not. We instructed mpileup to  
284 discard reads with mapping quality 0. The following was done in R. We discarded all  
285 positions covered by less than three reads (both BAM files combined). At each SNP, the  
286 number of polymorphic mutations was the number of different bases (alleles) found in the pea  
287 aphid population minus one. A fixed difference was counted if no base was shared at a

288 position between the pea aphid population and *A. svalbardicum*. The number of polymorphic  
289 non-synonymous mutations per codon was taken as the number of amino acids found in the  
290 pea aphid populations for that codon minus one. To count the number of fixed non-  
291 synonymous differences per codon, we considered that a codon might differ between the two  
292 species by up to three mutations. Any of these may involve a change in protein sequence that  
293 we cannot ascertain without knowledge on the order of appearance of the mutations. We  
294 adopted parsimony and considered the minimum number of mutations required between the  
295 two codons. If several codons were present in the pea aphid population (due to a SNP), we  
296 considered the minimum number of coding changes that any pair of codons between the pea  
297 aphid and *A. svalbardicum* involves. For all these counts, we discarded rare codons showing  
298 more than one SNP, because the actual codons (and amino acids) present in the pea aphid  
299 population cannot be determined without phasing. We counted the following for each gene:  
300 the number of polymorphic non-synonymous changes ( $P_n$ ), the number of all polymorphic  
301 changes minus  $P_n$  (which is the number of polymorphic synonymous mutations, noted  $P_s$ ),  
302 the number of fixed non-synonymous differences ( $D_n$ ), the number of all fixed differences  
303 minus  $D_n$  (which is the number of fixed synonymous changes, noted  $D_s$ ). DoS was then  
304 calculated as  $P_n/(P_n+P_s) - D_n/(D_n+D_s)$  by concatenating all genes from a given class of  
305 expression to avoid divisions by zero, due to genes without polymorphism or divergence, as  
306 done in Burgarella et al. (2015). We considered only genes whose average depth of coverage,  
307 as given by mpileup, was between 20 and 150 (expected coverage was ~85) to avoid  
308 including genes presenting multiple collapsed copies that could artificially inflate  
309 polymorphism.

310

## 311 **Statistical analyses**

312 Differences in expression levels between X-linked and autosomal genes in the different  
313 morphs, as well as differences in  $dN/dS$ ,  $dN$  and  $dS$  between X-linked and autosomal genes  
314 were tested with Mann-Whitney U tests. The latter analysis was done on all genes, and on  
315 genes grouped based on average expression over the three morphs. To evaluate evolutionary  
316 forces responsible for faster-X evolution, we then compared  $dN/dS$ , Tajima's D and DoS  
317 between X-linked and autosomal genes for classes of genes with different expression patterns  
318 (unbiased, male-biased, sexual female-biased and asexual female-biased genes). For biased  
319 genes, we considered different fold changes in expression (2- to 5-fold, and > 5-fold).  
320 Statistical significance was evaluated with Mann-Whitney U tests.

321

## 322 **Results**

### 323 **Gene assignment to the X and autosomes**

324 Based on the ratio of depth of coverage by reads from males over reads from females, 64% of  
325 the nucleotides assembled in the pea aphid reference genome (Acyr 2.0) were assigned to  
326 autosomes, 31% to the X chromosome while only 5% could not be assigned (supplementary  
327 figure S1). Genotypes of males at SNPs that were heterozygous in the female generally  
328 confirmed the assignment from coverage depth data (supplementary figure S2), though  
329 confirmation was not possible in regions lacking such SNPs. These estimates roughly  
330 correspond to the expected size of the X chromosome in the pea aphid, which represents  
331 ~30% of the chromosome content based on karyotypes (Mandrioli and Borsatti 2007). This  
332 assignment revealed a very high rate of misassembly in Acyr 2.0: 56% of scaffolds of size  
333  $\geq 150$  kb (which represent 80% of the assembly length) comprised blocks assigned to different

334 chromosome types (supplementary figure S3 and table S1). Based on assigned scaffold  
335 blocks, 19,263 predicted genes were located on autosomes, 13,726 on the X chromosome  
336 while 4,001 genes could not be unambiguously assigned. The X chromosome contains a  
337 higher fraction of predicted genes than expected from its relative size (42%, test of  
338 proportion,  $p < 10^{-15}$ ).

339

### 340 **Gene evolutionary rates**

341 By comparing pea aphid gene sequences to transcripts sequenced from a related species (*A.*  
342 *svalbardicum*), we assessed the rates of substitution. Results confirm faster-X evolution, as X-  
343 linked genes present almost a twice higher non-synonymous substitution rate,  $dN$  (mean  $dN_X =$   
344  $0.034$ ;  $dN_A = 0.019$ , Mann-Whitney  $U = 4839860$ ,  $p < 10^{-15}$ ,  $n = 9096$ ) and only slightly higher  
345 synonymous substitution rate,  $dS$  (mean  $dS_X = 0.101$ ;  $dS_A = 0.085$ , Mann-Whitney  $U =$   
346  $6190137$ ,  $p < 10^{-6}$ ). As a result, the evolution of X-linked genes involves more protein-  
347 sequence changes (in proportion) than the evolution of autosomal genes (mean  $dN_X/dS_X =$   
348  $0.390$ ;  $dN_A/dS_A = 0.237$ ; Mann-Whitney  $U = 5026170$ ,  $p < 10^{-15}$ , figure 2A and  
349 supplementary table S2).

350

### 351 **Causes of Faster-X evolution**

352 High ratios of non-synonymous to synonymous rates,  $dN/dS$ , can result from a decreased  
353 influence of selection - and thus an increased influence of drift - on amino acid substitutions  
354 (i.e., relaxed negative selection) and/or from more efficient selection of adaptive changes in  
355 the protein sequence (i.e., increased positive selection). To balance these two hypotheses, we  
356 used the expression levels of genes as proxies for their possible impact on fitness. Expression

357 levels of X-linked genes are lower than those of autosomal genes in all three main aphid  
358 morphs: males, sexual females and parthenogenetic females (figure 2B). Expression level  
359 averaged over the 13,726 X-linked genes ranges from ~52 reads/kb in sexual and asexual  
360 females to 155 reads/kb in males, while expression level averaged over the 19,263 autosomal  
361 genes varies from 575 (in asexual females) to 648 reads/kb in males. Genes that are not  
362 expressed or expressed at a low level may have a reduced effect on the phenotype and may  
363 therefore accumulate non-synonymous substitutions faster (reduced purifying selection). We  
364 indeed observe that, for both X and autosomes,  $dN/dS$  ratios decrease with increasing  
365 expression levels (averaged over the three morphs), and that the contrast between X and  
366 autosomes tends to decline for highly expressed genes (figure 2A, supplementary table S2).  
367 Slight contrast in  $dN$  ratios is still maintained for highly expressed genes, though  
368 (supplementary table S2). Therefore, low expression levels of X-linked genes may not  
369 entirely account for faster X-evolution in aphids.

370        Selection may also be relaxed in genes that are predominantly expressed in rare  
371 morphs (males and sexual females), which constitute a minor fraction of the annual life cycle  
372 of aphids dominated by asexual females. Relaxed selection on mutations affecting male-  
373 biased genes (Purandare et al. 2014, Brisson and Nuzhdin 2008), combined with the tendency  
374 of such genes to locate on the X (Jaquiéry et al. 2013; Pal and Vicoso 2015) could contribute  
375 to faster-X evolution. However, the influence of X-linkage could not properly be evaluated in  
376 Purandare et al. (2014) because misassembled scaffolds, rather than individual genes, were  
377 assigned to chromosomes. Our new dataset of X-linked and autosomal genes unambiguously  
378 confirms that the X is largely enriched in genes over-expressed in males, and to a smaller  
379 extent in those over-expressed in sexual females (table 1). Like Purandare et al. (2014), we  
380 observe higher  $dN/dS$  ratios in genes over-expressed in the rarer morphs (i.e. males and sexual



381 females, figure 3B-C), but not in genes over-expressed in the common morph  
382 (parthenogenetic females, figure 3D) when considering X-linked and autosomal genes  
383 together. Tajima's  $D$  also tends to increase in genes over-expressed in the sexual morphs  
384 compared to unbiased genes (significantly so for all male-biased and for 2- to 5-fold female-  
385 biased genes, figure 4B), but not in genes over-expressed in the common morph (where  $D$  is  
386 significantly lower compared to unbiased genes, figure 4D), a pattern compatible with relaxed  
387 selection on genes expressed mainly in the rare morphs. However, the DoS did not differ  
388 significantly between these categories of genes, except for strongly female-biased genes  
389 (supplementary figure S4).

390         When analyses are done by chromosome type,  $dN/dS$  ratios of X-linked genes are  
391 significantly higher than those of autosomal genes for both sexual female and male-biased  
392 genes (figure 3E-3H), but not for asexual females. Contrastingly, Tajima's  $D$  differs between  
393 chromosome types only for strongly male-biased genes (being lower for X-linked genes,  
394 suggesting more positive selection, figure 4F) and for unbiased genes (being larger for X-  
395 linked genes, possibly revealing more balanced selection, figure 4E). As a result, the  
396 enrichment of the X with genes expressed in the rare male morph (which have been  
397 hypothesized to evolve under relaxed selection) may not strongly contribute to faster-X  
398 evolution. No signal was detected between chromosome types based on the DoS index  
399 (supplementary figure S4).

400         Alternatively, the faster evolution of X-linked male-biased genes compared to  
401 autosomal male-biased genes could result from the fact that the former are present in  
402 hemizygous state in males. Non-synonymous mutations on the X are thus more exposed to  
403 selection in males, since they are not masked by other potentially dominant alleles, such that  
404 adaptive mutations on the X should more rapidly and more likely reach fixation than adaptive

405 mutations on autosomes. This hypothesis predicts that the contrast between substitution rates  
406 of X-linked genes and autosomal genes will be highest for male-biased genes, and lowest for  
407 sexual- and asexual female-biased genes, because in these morphs, the X is always diploid  
408 and adaptive mutations can be recessive. We indeed observe these patterns (figure 3F), and  
409 the significantly lower Tajima's D for X-linked male-biased genes compared to autosomal  
410 genes provides some support to this hypothesis (figure 4F).

411

## 412 **Discussion**

413 Here we performed a genome-wide identification of X-linked genes enabling to locate a large  
414 number (13,726) and proportion (42%) of predicted genes on the X chromosome. We  
415 demonstrated that these genes tend to evolve faster than autosomal genes on average,  
416 confirming earlier results based on a much smaller set of coding genes (Jaquiéry et al. 2012a).  
417 Faster-X evolution mainly results from low expression of a large fraction of X-linked genes,  
418 which would less affect the phenotype and may accumulate non-synonymous mutations. Our  
419 analyses also suggest that higher exposure of recessive X-linked alleles to selection in  
420 hemizygous males might also partially contribute to faster-X evolution via more efficient  
421 positive selection.

422 We demonstrate clear faster-X evolution in the pea aphid based on a large set of X-  
423 linked and autosomal genes. The non-synonymous to synonymous substitution ratio ( $dN/dS$ )  
424 for X-linked genes is 1.69 times greater than for autosomal genes. This clearly places aphids  
425 among species showing strong contrast between evolution of X-linked and autosomal genes.  
426 Excluding sex-specific genes (e.g. Torgerson 2003; Kousathanas et al. 2014) and genes that  
427 escape post-meiotic silencing (Sin et al. 2012) for which X-linked sequences evolve much  
428 faster than autosomal ones, the  $dN/dS$  for X-linked genes is between ~0.9 and ~1.8 times that  
18

429 of autosomes in most species studied (i.e., *Drosophila*, mammals, birds and moths, review in  
430 Meisel and Connallon 2013; see also Sackton et al. 2014).

431 Remarkably, the pea aphid presents the same effective population size for the X and  
432 autosomes (Jaquiéry et al. 2012a), such that hemizyosity in males should be the only  
433 differentiating factor affecting the evolution of genes located on different chromosome types.  
434 However, our analyses revealed another key difference between X-linked and autosomal  
435 genes, in that the former are on average 4 to 10 times less expressed than the latter (figure  
436 2B), and expectedly show higher rates of substitution. Such negative correlations between  
437 substitution rates and expression level have already been observed in several species (e.g.,  
438 Drummond et al. 2005, Nguyen et al. 2015, Zhang and Yang 2015). Therefore, enrichment of  
439 the X with lowly expressed genes explains faster-X evolution in aphids to a large extent.

440 Gene expression differs between chromosome types in another dimension, as the X is  
441 enriched in genes that are mostly expressed in the rare morphs (i.e., males and sexual females)  
442 (Jaquiéry et al. 2013, Pal and Vicoso 2015). Such genes should also evolve under more  
443 relaxed constraints as they are exposed to the selective environment only during a short period  
444 of the aphid life cycle (Brisson and Nuzhdin 2008, Purandare et al. 2014). However, our  
445 analyses revealed that X-linked male-biased genes show lower Tajima's D than autosomal  
446 male-biased genes (figure 4F-4G). As a result, enrichment of the X chromosome with genes  
447 expressed in the rare male morph is unlikely to be an important contributor to faster-X  
448 evolution in the pea aphid.

449 This leaves hemizyosity of the X chromosome in males, which exposes all X-linked  
450 alleles expressed in males to the selective environment, as another contributing cause. This  
451 hypothesis is supported by the contrast in  $dN/dS$  between X-linked genes and autosomal  
452 genes, which is larger for male-biased genes than for sexual and asexual females-biased genes

453 (figure 3F-3H), and by the lower Tajima's D on male-biased X-linked genes than for those on  
454 autosomes (figure 4F-4G), but not by the DoS, which shows no sign of selection.

455 Mean expression levels of X-linked genes measured in the whole body are strikingly  
456 lower than those of autosomal genes, in all morphs studied. The difference we found is more  
457 pronounced than in previous observations (Jaquiéry et al. 2013, Pal and Vicoso 2015)  
458 probably due to more reliable gene assignments to chromosomes (we found that 10% of the  
459 3,712 genes used in Jaquiéry et al. 2013 had been misassigned because of scaffold  
460 misassembly). Lower expression of X-linked genes compared to autosomal genes is observed  
461 in mammals (Nguyen et al. 2015), but not in *Drosophila* (Zhang and Presgraves 2016). To our  
462 knowledge, no other taxon displays such a strong contrast between the X and autosomes gene  
463 expression levels as does the pea aphid. This raises the question as to why genes on the X are  
464 so little expressed in this species. A theoretical model (Jaquiéry et al. 2013) predicts that the  
465 X chromosome is more easily invaded by sexually antagonistic alleles beneficial to males and  
466 deleterious to females than autosomes. This may have favored a global decrease in gene  
467 expression of this chromosome in the common morph (the asexual females) for which it could  
468 be harmful. Pseudogenisation on the X chromosome would have ensued if genetic variation in  
469 lowly expressed genes has little effect on fitness. Yet, this chromosome carries one third of  
470 the genome and contains a higher fraction of genes than predicted by its relative size. Insights  
471 into the role of sexual antagonism on the peculiar expression patterns observed here could be  
472 gained by studying gene expression of this chromosome in different male and female tissues.  
473 Particularly, transcriptomes of tissues subject to contrasted sex-specific selection pressures  
474 (e.g. Parisi 2003; Khil et al. 2004; Yang et al. 2006; Huylmans and Parsch 2015) could help  
475 examine this hypothesis.

476 Assignments of scaffold blocks to chromosomes revealed widespread errors in the pea  
477 aphid genome assembly (Acyr 2.0). More than half of scaffolds larger than 150kb are clear  
478 chimeras of X and autosomes. This is a minimal estimate for the rate of misassembly, since  
479 our method only detects breakpoints between X and autosomes. Given that the X represents  
480 30% of the pea aphid genome, assembly errors involving two X-linked genomic regions, and  
481 those involving two autosomal regions should respectively represent  $0.3^2$  and  $0.7^2$  (58% in  
482 total) of all assembly errors, a significant number of events that we could not detect.  
483 Moreover, assembly errors involving fragments of less than 10 kb could not be detected given  
484 the resolution of our analyses (see methods). Other lines of evidence argue for frequent errors  
485 in the current pea aphid genome assembly. First, a genetic map of 305 microsatellite markers  
486 (Jaquiéry et al. 2014) validates our assignment to chromosomes, and also demonstrates high  
487 rates of scaffold misassembly (see supplementary file S1). Second, X-A breakpoints co-  
488 localize with sharp variations in genetic differentiation ( $F_{ST}$ ) between pea aphid populations  
489 from different host plants, as determined by high-density genome scans (Nouhaud et al.  
490 submitted). Third, synteny between Acyr 2.0 scaffolds and scaffolds from two *Myzus persicae*  
491 genomes (Mathers et al. 2017, available at [www.aphidbase.com](http://www.aphidbase.com)) stops at X-A breakpoints  
492 (data not shown). Fourth, entire scaffolds assigned by Bickel et al. (2013) to the X  
493 chromosome account for 11% of Acyr 2.0, much lower than the ~30% of the genome that this  
494 chromosome represents, based on karyotypes (Mandrioli and Borsatti 2007). Bickel et al.  
495 (2013) explained this discrepancy by assembly errors combined with methodological bias  
496 towards assigning misassembled scaffolds to autosomes (a hypothesis we confirm by the  
497 comparison of scaffold assignments to chromosomes by Bickel et al. 2013 and the present  
498 study, see supplementary figure S5). By contrast, our new assignments to chromosomes  
499 provide estimates corresponding to the expected relative size of the X. Consequently, we

500 confidently conclude that the genome of the pea aphid presents considerable assembly  
501 problems, to a degree that goes far beyond what current assembly pipelines typically yield  
502 (e.g. Salzberg et al. 2004; Muggli et al. 2015). While the cause of these errors remains  
503 undetermined, they have important drawbacks for genomic studies on a species that is  
504 currently considered the model aphid, in particular those relying on the physical organization  
505 of the genome, ranging from high-resolution genome scans to studies of chromatin  
506 conformation, genomic rearrangements, etc. We therefore urge for a reassembly of the pea  
507 aphid genome based on additional data. The results presented here should however not be  
508 affected by misassembly as we were able to assign unambiguously almost 90% of the 36,990  
509 predicted gene of the pea aphid. This means that at fine-grain level, that of a few kilobases to  
510 few tens of kilobases (the range within which most genes are contained), the chimerism  
511 problem is not a major issue.

512         In conclusion, we have shown here that faster-X evolution of proteins in the pea aphid  
513 is principally explained by relaxed selection on lowly expressed genes, a class of genes that is  
514 more frequent on the X chromosome than on autosomes. Exposure of X-linked recessive  
515 alleles to selection in hemizygous males could play an additional, yet marginal, role in faster-  
516 X evolution. Importantly, the pea aphid complex, which includes races and cryptic species at  
517 different stages of divergence (Peccoud et al. 2009a, 2009b, 2014), offers excellent  
518 opportunities to investigate mechanisms driving genome evolution through comparative  
519 genomics. In particular, characterizing gene expression in morphs of closely and distantly  
520 related species could help disentangling the role of drift and selection in the low expression of  
521 the X and its masculinization.

## 522 **References**

- 523 Achaz G. 2008. Testing for neutrality in samples with sequencing errors. *Genetics*, 179:1409-1424.
- 524 Altschul SF, Gish W, Miller W, Myers EW, Lipman DJ. 1990. Basic local alignment search tool. *J.*  
525 *Mol. Biol.* 215:403–410.
- 526 Anders S, Huber W. 2010. Differential expression analysis for sequence count data. *Genome Biol.*  
527 11:R106.
- 528 Avila V, Campos JL, Charlesworth B. 2015. The effects of sex-biased gene expression and X-linkage  
529 on rates of adaptive protein sequence evolution in *Drosophila*. *Biol. Lett.* 11:20150117.
- 530 Avila V et al. 2014. Faster-X effects in two *Drosophila* lineages. *Genome Biol. Evol.* 6:2968–2982.
- 531 Bachtrog D et al. 2011. Are all sex chromosomes created equal? *Trends Genet.* 27:350–357.
- 532 Baines JF, Sawyer SA, Hartl DL, Parsch J. 2008. Effects of X-linkage and sex-biased gene expression  
533 on the rate of adaptive protein evolution in *Drosophila*. *Mol. Biol. Evol.* 25:1639–1650.
- 534 Bickel RD, Dunham JP, Brisson JA. 2013. Widespread selection across coding and noncoding DNA in  
535 the pea aphid genome. *G3* 3:993–1001.
- 536 Brisson JA, Nuzhdin SV. 2008. Rarity of males in pea aphids results in mutational decay. *Science*  
537 319:58–58.
- 538 Burgarella C et al. 2015. Molecular evolution of freshwater snails with contrasting mating systems.  
539 *Mol. Biol. Evol.* 32:2403–2416.
- 540 Caballero A. 1994. Developments in the prediction of effective population size. *Heredity* 73:657–679.
- 541 Caballero A. 1995. On the effective size of populations with separate sexes, with particular reference  
542 to sex-linked genes. *Genetics* 139:1007–1011.
- 543 Caillaud MC, Boutin M, Braendle C, Simon J-C. 2002. A sex-linked locus controls wing  
544 polymorphism in males of the pea aphid, *Acyrtosiphon pisum* (Harris). *Heredity* 89:346–352.
- 545 Castresana J. 2000. Selection of conserved blocks from multiple alignments for their use in  
546 phylogenetic analysis. *Mol. Biol. Evol.* 17:540–552.
- 547 Charif D, Lobry JR. 2007. SeqinR 1.0-2: a contributed package to the R project for statistical  
548 computing devoted to biological sequences retrieval and analysis. In: Bastolla U, Porto M,  
549 Roman HE, Vendruscolo M, editors. *Structural approaches to sequence evolution: Molecules,*  
550 *networks, populations. Biological and Medical Physics, Biomedical Engineering.* New York:  
551 Springer Verlag. p. 207–232.
- 552 Charlesworth B, Coyne JA, Barton NH. 1987. The relative rates of evolution of sex chromosomes and  
553 autosomes. *Am. Nat.* 130:113–146.
- 554 Charlesworth D, Charlesworth B, Marais G. 2005. Steps in the evolution of heteromorphic sex  
555 chromosomes. *Heredity* 95:118–128.
- 556 Coyne JA, Orr, H. A. 2004. *Speciation.* Sinauer Associates. Sunderland, MA
- 557 Drummond DA, Bloom JD, Adami C, Wilke CO, Arnold FH. 2005. Why highly expressed proteins  
558 evolve slowly. *Proc. Natl. Acad. Sci.* 102:14338–14343.
- 559 DePristo MA et al. 2011. A framework for variation discovery and genotyping using next-generation  
560 DNA sequencing data. *Nat. Genet.* 43:491–498.
- 561 Frantz A, Plantegenest M. & Simon JC. 2010. Host races of the pea aphid *Acyrtosiphon pisum* differ  
562 in male wing phenotypes. *Bull. Entomol. Res.* 100:59-66.
- 563 Gautier M et al. 2013. Estimation of population allele frequencies from next-generation sequencing  
564 data: pool-versus individual-based genotyping. *Mol. Ecol.* 22:3766–3779.

- 565 Gouin A et al. 2015. Whole-genome re-sequencing of non-model organisms: lessons from unmapped  
566 reads. *Heredity* 114:494–501.
- 567 Gouzy J, Carrere S, Schiex T. 2009. FrameDP: sensitive peptide detection on noisy matured  
568 sequences. *Bioinformatics* 25:670–671.
- 569 Grabherr MG et al. 2011. Full-length transcriptome assembly from RNA-Seq data without a reference  
570 genome. *Nat. Biotechnol.* 29:644–652.
- 571 Huang HW, Mullikin JC, Hansen NF. 2015. Evaluation of variant detection software for pooled next-  
572 generation sequence data. *BMC Bioinformatics* 16:1–9.
- 573 Huylmans AK, Parsch J. 2015. Variation in the X:Autosome distribution of male-biased genes among  
574 *Drosophila melanogaster* tissues and its relationship with dosage compensation. *Genome*  
575 *Biol. Evol.* 7:1960–1971.
- 576 Hvilsom C et al. 2012. Extensive X-linked adaptive evolution in central chimpanzees. *Proc. Natl.*  
577 *Acad. Sci.* 109:2054–2059.
- 578 International Aphid Genome Consortium. 2010. Genome sequence of the pea aphid *Acyrtosiphon*  
579 *pisum*. *Plos Biol.* 8:e1000313.
- 580 Jaquiéry J et al. 2012a. Accelerated evolution of sex chromosomes in aphids, an XO system. *Mol. Biol.*  
581 *Evol.* 29:837–847.
- 582 Jaquiéry J et al. 2012b. Genome scans reveal candidate regions involved in the adaptation to host plant  
583 in the pea aphid complex. *Mol. Ecol.* 21:5251–5264.
- 584 Jaquiéry J et al. 2013. Masculinization of the X chromosome in the pea aphid. *Plos Genet.*  
585 9:e1003690.
- 586 Jaquiéry J et al. 2014. Genetic control of contagious asexuality in the pea aphid. *PLoS Genet.*  
587 10:e1004838.
- 588 Johnson NA, Lachance J. 2012. The genetics of sex chromosomes: evolution and implications for  
589 hybrid incompatibility. *Ann. N. Y. Acad. Sci.* 1256:E1–E22.
- 590 Khil PP, Smirnova NA, Romanienko PJ, Camerini-Otero RD. 2004. The mouse X chromosome is  
591 enriched for sex-biased genes not subject to selection by meiotic sex chromosome  
592 inactivation. *Nat. Genet.* 36:642–646.
- 593 Kimura M. 1983. The neutral theory of molecular evolution. Univ. press. Cambridge
- 594 Kitano J et al. 2009. A role for a neo-sex chromosome in stickleback speciation. *Nature* 461:1079–  
595 1083.
- 596 Kofler R et al. 2011. PoPoolation: a toolbox for population genetic analysis of next generation  
597 sequencing data from pooled individuals. *PloS one*, 6:e15925.
- 598 Kousathanas A, Halligan DL, Keightley PD. 2014. Faster-X adaptive protein evolution in house mice.  
599 *Genetics* 196:1131–1143.
- 600 Langley CH et al. 2012. Genomic variation in natural populations of *Drosophila melanogaster*.  
601 *Genetics* 192:533–598.
- 602 Langmead B, Salzberg SL. 2012. Fast gapped-read alignment with Bowtie 2. *Nat. Methods* 9:357–  
603 359.
- 604 Li H et al. 2009. The sequence alignment/Map format and SAMtools. *Bioinformatics* 25:2078–2079.
- 605 Li WH. 1993. Unbiased estimation of the rates of synonymous and nonsynonymous substitution. *J.*  
606 *Mol. Evol.* 36:96–99.
- 607 Mackay TFC et al. 2012. The *Drosophila melanogaster* genetic reference panel. *Nature* 482:173–178.
- 608 Mandrioli M, Borsatti F. 2007. Analysis of heterochromatic epigenetic markers in the holocentric  
609 chromosomes of the aphid *Acyrtosiphon pisum*. *Chromosome Res.* 15:1015–1022.



- 610 Mank JE, Nam K, Ellegren H. 2010. Faster-Z evolution is predominantly due to genetic drift. Mol.  
611 Biol. Evol. 27:661–670.
- 612 Mank JE, Vicoso B, Berlin S, Charlesworth B. 2010. Effective population size and the faster-X effect:  
613 empirical results and their interpretation. Evolution 64:663–674.
- 614 Mathers TC et al. 2017 Rapid transcriptional plasticity of duplicated gene clusters enables a clonally  
615 reproducing aphid to colonise diverse plant species. Genome Biology, 18:27.
- 616 McDonald JH, Kreitman M. 1991. Adaptive protein evolution at the Adh locus in *Drosophila*. Nature  
617 351:652–654.
- 618 McKenna A et al. 2010. The Genome Analysis Toolkit: A MapReduce framework for analyzing next-  
619 generation DNA sequencing data. Genome Res. 20:1297–1303.
- 620 Meiklejohn CD, Tao Y. 2010. Genetic conflict and sex chromosome evolution. Trends Ecol. Evol.  
621 25:215–223.
- 622 Meisel RP, Connallon T. 2013. The faster-X effect: integrating theory and data. Trends Genet.  
623 29:537–544.
- 624 Muggli MD, Puglisi SJ, Ronen R, Boucher C. 2015. Misassembly detection using paired-end sequence  
625 reads and optical mapping data. Bioinformatics 31:i80–i88.
- 626 Nguyen L-P, Galtier N, Nabholz B. 2015. Gene expression, chromosome heterogeneity and the fast-X  
627 effect in mammals. Biol. Lett. 11:20150010.
- 628 Pages H, Aboyoun P, Gentleman R, DebRoy S. 2016. Biostrings: String objects representing  
629 biological sequences, and matching algorithms. R package version 2.40.2.
- 630 Pal A, Vicoso B. 2015. The X chromosome of hemipteran insects: conservation, dosage compensation  
631 and sex-biased expression. Genome Biol. Evol. 7:3259–3268.
- 632 Parisi M. 2003. Paucity of genes on the *Drosophila* X chromosome showing male-biased expression.  
633 Science 299:697–700.
- 634 Peccoud J et al. 2008. Host range expansion of an introduced insect pest through multiple  
635 colonizations of specialized clones. Mol. Ecol. 17:4608–4618.
- 636 Peccoud J, Ollivier A, Plantegenest M, Simon J-C. 2009a. A continuum of genetic divergence from  
637 sympatric host races to species in the pea aphid complex. Proc. Natl. Acad. Sci. 106:7495–  
638 7500.
- 639 Peccoud J, Simon J-C, McLaughlin HJ, Moran NA. 2009b. Post-Pleistocene radiation of the pea aphid  
640 complex revealed by rapidly evolving endosymbionts. Proc. Natl. Acad. Sci. U. S. A.  
641 106:16315–16320.
- 642 Peccoud J et al. 2014. Widespread host-dependant hybrid unfitnes in the pea aphid species complex:  
643 postzygotic isolation in pea aphids. Evolution 68:2983–2995.
- 644 Purandare SR, Bickel RD, Jaquiéry J, Rispe C, Brisson JA. 2014. Accelerated evolution of morph-  
645 biased genes in pea aphids. Mol. Biol. Evol. 31:2073–2083.
- 646 R Development Core Team 2015: A language and environment for statistical computing. Vienna,  
647 Austria Available from: URL <http://www.R-project.org>.
- 648 Rice WR. 1984. Sex Chromosomes and the Evolution of Sexual Dimorphism. Evolution 38:735–742.
- 649 Rispe C et al. 2016. De novo transcriptome assembly of the grapevine phylloxera allows identification  
650 of genes differentially expressed between leaf- and root-feeding forms. BMC Genomics 17:1–  
651 15.
- 652 Sackton TB et al. 2014. Positive selection drives faster-Z evolution in silkmths. Evolution 68:2331–  
653 2342.

- 654 Saether SA et al. 2007. Sex chromosome-linked species recognition and evolution of reproductive  
655 isolation in flycatchers. *Science* 318:95–97.
- 656 Salzberg SL, Church D, DiCuccio M, Yaschenko E, Ostell J. 2004. The genome assembly archive: a  
657 new public resource. *PLoS Biol* 2:e285.
- 658 Simon J-C et al. 2011. Facultative symbiont infections affect aphid reproduction. *PLoS ONE*  
659 6:e21831.
- 660 Sin H-S, Ichijima Y, Koh E, Namiki M, Namekawa SH. 2012. Human postmeiotic sex chromatin and  
661 its impact on sex chromosome evolution. *Genome Res.* 22:827–836.
- 662 Soh YQS et al. 2014. Sequencing the mouse Y chromosome reveals convergent gene acquisition and  
663 amplification on both sex chromosomes. *Cell* 159:800–813.
- 664 Stoletzki N, Eyre-Walker A. 2011. Estimation of the neutrality index. *Mol. Biol. Evol.* 28:63–70.
- 665 Tajima F. 1989. Statistical method for testing the neutral mutation hypothesis by DNA polymorphism.  
666 *Genetics* 123:485–595.
- 667 Talavera G, Castresana J. 2007. Improvement of phylogenies after removing divergent and  
668 ambiguously aligned blocks from protein sequence alignments. *Syst. Biol.* 56:564–577.
- 669 Torgerson DG. 2003. Sex-linked mammalian sperm proteins evolve faster than autosomal ones. *Mol.*  
670 *Biol. Evol.* 20:1705–1709.
- 671 Venables WN, Ripley BD. 2002. *Modern applied statistics with S*. 4th ed. New York: Springer
- 672 Vicoso B, Charlesworth B. 2009. Effective population size and the faster-X effect: an extended model.  
673 *Evolution* 63:2413–2426.
- 674 Wilm A et al. 2012. LoFreq: a sequence-quality aware, ultra-sensitive variant caller for uncovering  
675 cell-population heterogeneity from high-throughput sequencing datasets. *Nucleic Acids Res.*  
676 40:11189–11201.
- 677 Wilson ACC, Sunnucks P, Hales DF. 1997. Random loss of X chromosome at male determination in  
678 an aphid, *Sitobion* near *fragariae*, detected using an X-linked polymorphic microsatellite  
679 marker. *Genet. Res.* 69:233–236.
- 680 Wright S. 1931. Evolution in mendelian populations. *Genetics* 16:97–159.
- 681 Yang X et al. 2006. Tissue-specific expression and regulation of sexually dimorphic genes in mice.  
682 *Genome Res.* 16:995–1004.
- 683 Zhang Z, Presgraves DC. 2016. *Drosophila* X-linked genes have lower translation rates than  
684 autosomal genes. *Mol. Biol. Evol.* 33:413–428
- 685 Zhang J, Yang J-R. 2015. Determinants of the rate of protein sequence evolution. *Nat. Rev. Genet.*  
686 16:409–420.
- 687

## 688 **Acknowledgements**

689 This work was supported by the Agence Nationale de la Recherche (grants ANR-09-GENM-  
690 017-001 to Denis Tagu, ANR-11-BSV7-005-01 to Denis Tagu and ANR-11-BSV7-007 to  
691 JCS); INRA-AIP BioRessources (project Poly-Express to JCS and Denis Tagu); the  
692 Fondation pour la Recherche sur la Biodiversité (grant AAP-IN-2009-020 to JCS); the Institut  
693 Polaire Francais Paul-Emile Victor (IPEV project 426 Arctaphid to JCS); the Genoscope  
694 (project 62 AAP 2009/2010 to JCS) and the Swiss National Science Foundation (grants  
26

695 PBLAA-122658 & PA00P3-139720 to J.J.). We would like to thank the GenOuest platform  
696 for the use of its cluster to perform the computational analyses.

697

## 698 **Figure legends**

699 **Fig. 1.** Life-cycle of the pea aphid and ploidy levels for autosomes (A) and the sex-  
700 chromosome (X) (adapted from Jaquiéry et al. 2013).

701

702 **Fig. 2.** Evolutionary rates for autosomal and X-linked genes and gene expression in males,  
703 sexual and asexual females. A) Evolutionary rates ( $dN/dS$ ) are shown for all genes (expressed  
704 or not in *A. pisum*) and for genes expressed at different levels (when averaged over male,  
705 sexual and asexual females): lowly expressed genes (i.e. covered by < 100 reads/kb of exon  
706 model); moderately expressed (from 100 to 1000 reads/kb), highly expressed genes (>1000  
707 reads/kb). The number of genes per category is shown above each boxplot. B) Expression  
708 level for X-linked ( $n = 13613$ ) and autosomal genes ( $n = 18812$ ) in males, sexual females and  
709 asexual females. It should be noted that males carry only one X chromosome per cell and  
710 females carry two. Significance was tested with Mann-Whitney U tests.

711

712 **Fig. 3.** Substitution rates of genes ( $dN/dS$ , measured between *A. pisum* and *A. svalbardicum*)  
713 according to the ratios of expression levels between morphs. Panels A-D consider all genes  
714 together (X-linked and autosomal), and panels E-H consider X-linked (dark grey) and  
715 autosomal (light grey) genes separately. The number of genes in each class is shown above  
716 each boxplot. Only genes supported by at least 100 reads/kb of exon model were retained. ub:  
717 unbiased genes ( $p_{adj} > 0.1$  for morph effect on expression), 2-5: levels of gene expression are  
718 two to five times higher in the specified morph ( $p_{adj} < 0.05$  for morph effect), >5: levels of  
719 gene expression are at least five times higher in the specified morph ( $p_{adj} < 0.05$ ).  
720 Significance of differences: ns:  $p > 0.05$ ; \* $p < 0.05$ , \*\* $p < 0.01$ , \*\*\* $p < 0.001$  (Mann-Whitney  
721 U tests). For panels B-D, differences correspond to comparisons with genes of the “unbiased”  
722 category, while X and autosomes were compared in panels F-H.

723 **Fig. 4.** Tajima's D according to the ratios of gene expression levels between morphs. Panels  
724 A-D consider all genes together (X-linked and autosomal) and panels E-H consider X-linked  
725 (dark grey) and autosomal (light grey) genes separately. Terms are defined as in Figure 3.  
726 Dashed lines show median values for unbiased genes. Significance of differences was tested  
727 with Mann-Whitney U tests.

728

729

730

731 **Tables**

732 **Table 1.** Number of X-linked and autosomal genes and frequency of X-linkage for classes of  
 733 genes with contrasted patterns of expression between morphs.

734

| Category of genes                                   | number of X-linked genes | number of autosomal genes | Frequency of X-linkage | <i>p</i> value <sup>6</sup> |
|-----------------------------------------------------|--------------------------|---------------------------|------------------------|-----------------------------|
| All <sup>1</sup>                                    | 13726                    | 19263                     | 0.42                   | 10 <sup>-16</sup>           |
| Low expression <sup>2</sup> (less than 10 reads/kb) | 10995                    | 8136                      | 0.57                   | 10 <sup>-16</sup>           |
| Expressed <sup>3</sup> (at least 10 reads/kb)       | 2771                     | 11127                     | 0.20                   | 0.0001                      |
| Unbiased <sup>4</sup> (>10 reads/kb & padj>0.1)     | 697                      | 3355                      | 0.17                   | na                          |
| 2-fold male-biased <sup>5</sup>                     | 1546                     | 2245                      | 0.41                   | 10 <sup>-16</sup>           |
| 5-fold male-biased <sup>5</sup>                     | 962                      | 948                       | 0.50                   | 10 <sup>-16</sup>           |
| 2-fold sexual female-biased <sup>5</sup>            | 448                      | 1369                      | 0.25                   | 10 <sup>-10</sup>           |
| 5-fold sexual female-biased <sup>5</sup>            | 148                      | 407                       | 0.27                   | 10 <sup>-7</sup>            |
| 2-fold asexual female-biased <sup>5</sup>           | 244                      | 1023                      | 0.19                   | 0.10                        |
| 2-fold asexual female-biased <sup>5</sup>           | 93                       | 423                       | 0.18                   | 0.68                        |

<sup>1</sup>all predicted genes that were assigned to the X or autosomes are included

<sup>2</sup>genes with on average <10 reads/kb of exon (average over the 3 morphs)

<sup>3</sup>genes with on average ≥10 reads/kb of exon (average over the 3 morphs)

<sup>4</sup>genes with on average ≥10 reads/kb of exon (average over the 3 morphs) and with an adjusted *p*-value ≥ 0.1 when tested for morph-biased expression.

<sup>5</sup>A gene was included in the morph-biased category (either male-, female- or asexual-biased) if the adjusted *p*-value for a morph effect was <0.05 and if it was at least *x*-fold (2 or 5) more expressed in one of the morph compared to the two other morphs.

<sup>6</sup>Deviation from expectation (given by the “unbiased” category) was evaluated with a test of proportion.

742 **Figures**

743 **Figure 1**

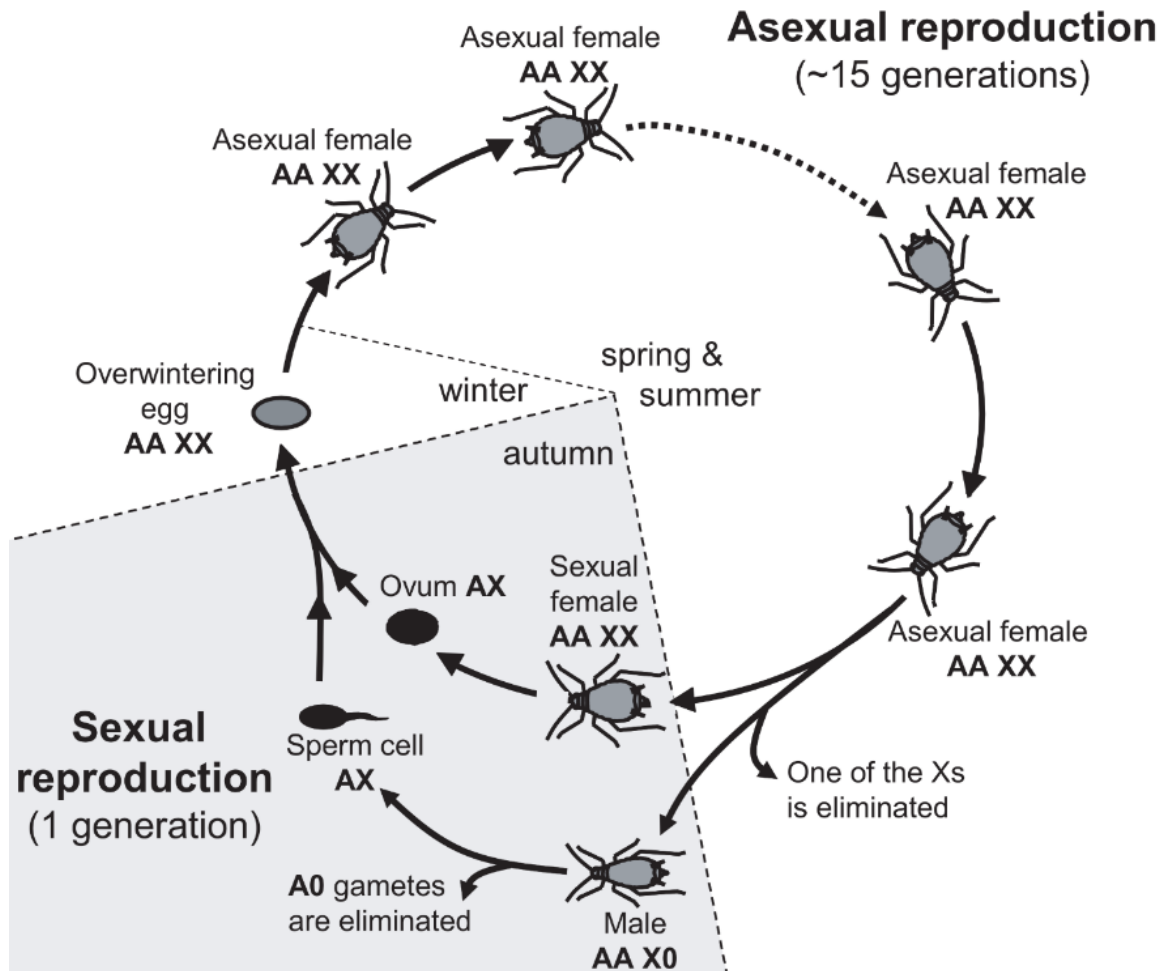

744

745

746

747 **Figure 2**

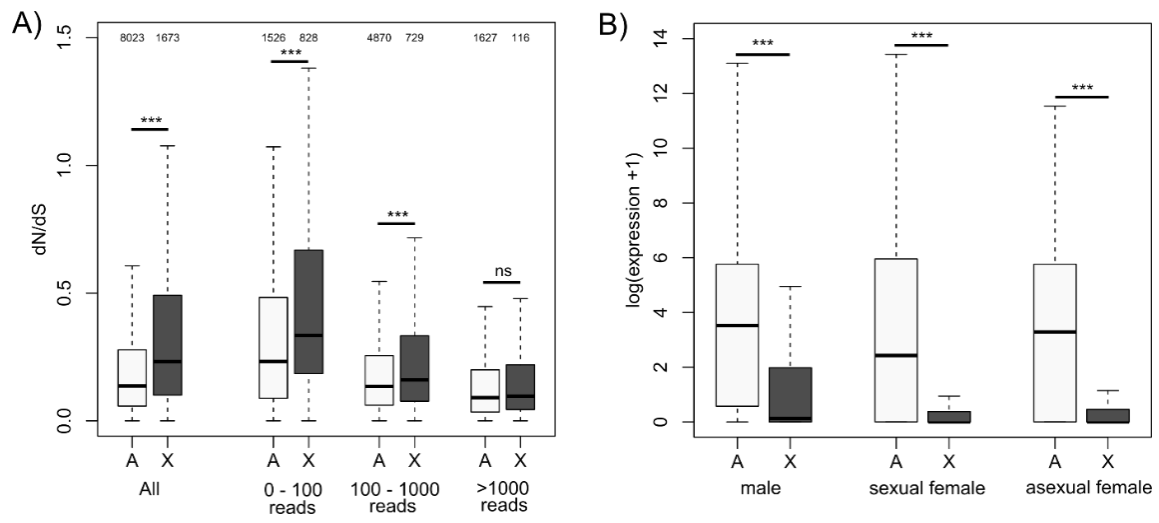

748

749

750 **Figure 3**

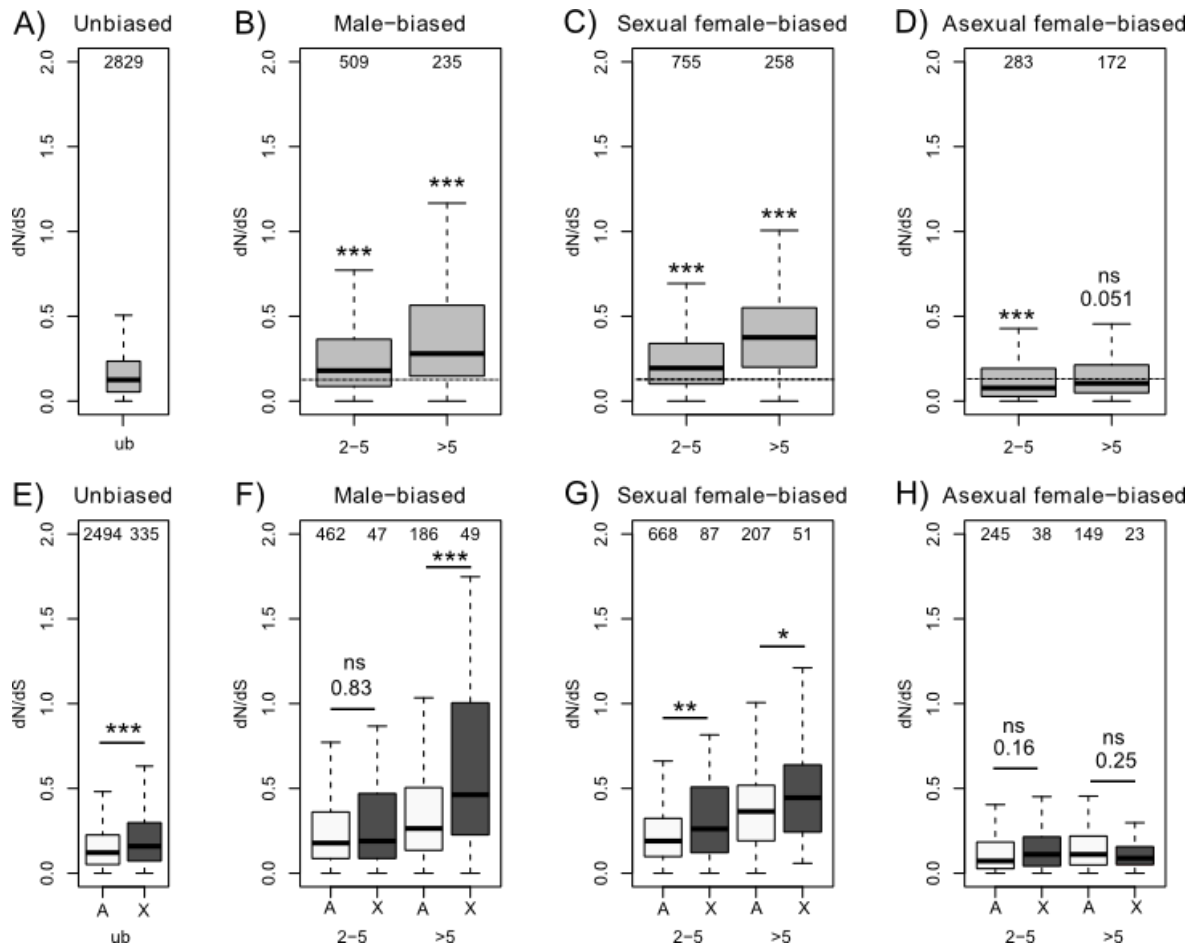

751

752



753 **Figure 4**

754

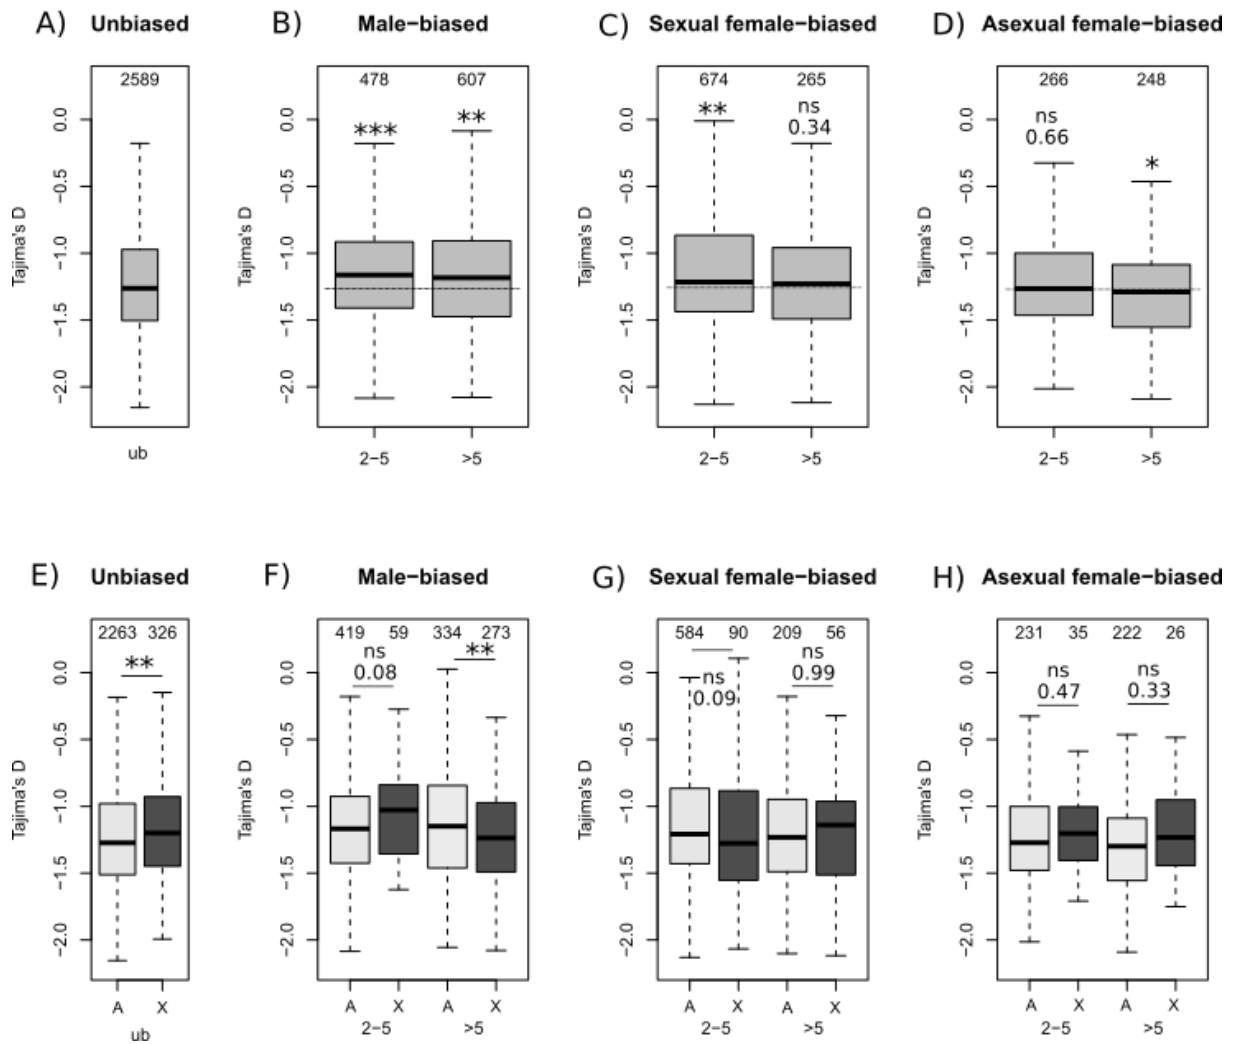

755

756
